# Supplementary material
Source: PubMed Central journal article supplement (PMC4317734)
Supplement: CJN.03200314_CJN03200314SupplementaryData.pdf [file CJN.03200314_CJN03200314SupplementaryData.pdf]

**Supplemental Table 1:** Multivariable analyses examining interactions between risk factors and risk group associated with the development of AKI

| <b>Outcome: AKI</b>                        | $\chi^2$ (df) | <b>P-value<sup>a</sup></b> |
|--------------------------------------------|---------------|----------------------------|
| <b>Risk Group*</b>                         |               |                            |
| <b>Age</b>                                 | 4.7 (1)       | 0.03                       |
| <b>Race</b>                                | 2.1 (2)       | 0.35                       |
| <i>Diabetes</i>                            | -             | -                          |
| <i>Cardiac Disease</i>                     | -             | -                          |
| <i>Chronic Renal Disease</i>               | -             | -                          |
| <b>History of Hypertension</b>             | 8.1 (1)       | 0.004                      |
| <b>Multiple Comorbidities</b>              | 21.4 (1)      | <0.001                     |
| <i>Surgical Admission</i>                  | -             | -                          |
| <b>Reference eGFR</b>                      | 1.5 (2)       | 0.46                       |
| <b>Severity of Hypotension<sup>b</sup></b> | 0.02 (1)      | 0.9                        |
| <b>Suspected Sepsis</b>                    | 0.7 (1)       | 0.39                       |
| <i>ACE/ARB Inhibitor</i>                   | -             | -                          |
| <b>Vancomycin</b>                          | 0.01 (1)      | 0.93                       |
| <b>Aminoglycoside</b>                      | 0.2 (1)       | 0.66                       |
| <i>Antibiotics</i>                         | -             | -                          |
| <b>Calcineurin Inhibitor</b>               | 27.3 (1)      | <0.001                     |
| <i>Non-Steroidal Drugs</i>                 | -             | -                          |
| <b>Diuretics</b>                           | 0.7 (1)       | 0.4                        |
| <b>Other Nephrotoxic Drugs</b>             | 16.9 (1)      | <0.001                     |

Italicized risk factors were considered for inclusion in the main effects model but had a p-value  $\leq 0.05$  and were ultimately left out. <sup>a</sup> Each p-value comes from a different multivariable logistic regression with risk group, 12 risk factors (in bold) and one interaction. <sup>b</sup> Area under the curve for severity and duration of hypotension (see methods).

**Supplemental Table 2:** Characteristics of low risk patients developing AKI stratified by timing of mechanical ventilation or vasopressors

| Characteristics*                                            | AKI after MV or Vasopressors<br>(N = 262) | AKI before* MV or Vasopressors<br>(N = 4,375) | All<br>(N = 4,637) | P Value** |
|-------------------------------------------------------------|-------------------------------------------|-----------------------------------------------|--------------------|-----------|
| <b>Age</b>                                                  |                                           |                                               |                    |           |
| 18 to 44                                                    | 17 (6.5)                                  | 512 (11.7)                                    | 529 (11.4)         |           |
| 45 to < 65                                                  | 94 (35.9)                                 | 1,487 (34)                                    | 1,581 (34.1)       | 0.001     |
| 65 to < 75                                                  | 78 (29.8)                                 | 930 (21.3)                                    | 1,008 (21.7)       |           |
| ≥ 75                                                        | 73 (27.9)                                 | 1,446 (33.1)                                  | 1,519 (32.8)       |           |
| <b>Males</b>                                                | 166 (63.4)                                | 2,350 (53.7)                                  | 2,516 (54.3)       | 0.002     |
| <b>Race</b>                                                 |                                           |                                               |                    |           |
| White                                                       | 210 (80.2)                                | 3,386 (77.4)                                  | 3,596 (77.6)       |           |
| Black                                                       | 15 (5.7)                                  | 352 (8)                                       | 367 (7.9)          | 0.38      |
| Other                                                       | 37 (14.1)                                 | 637 (14.6)                                    | 674 (14.5)         |           |
| <b>BMI, Kg/m2, Median (Q1-Q3), (n=4,327)</b>                | 27.6 (23.9-31.4)                          | 28.1 (24.3-33.5)                              | 28.1 (24.2-33.2)   | 0.03      |
| <b>Comorbid Condition</b>                                   |                                           |                                               |                    |           |
| Diabetes                                                    | 31 (11.8)                                 | 356 (8.1)                                     | 387 (8.3)          | 0.04      |
| Cardiac Disease                                             | 50 (19.1)                                 | 444 (10.1)                                    | 494 (10.7)         | <0.001    |
| Chronic Renal Disease                                       | 6 (2.3)                                   | 94 (2.1)                                      | 100 (2.2)          | 0.88      |
| History of Hypertension                                     | 113 (43.1)                                | 1,653 (37.8)                                  | 1,766 (38.1)       | 0.08      |
| Multiple Comorbidity                                        | 110 (42)                                  | 1,541 (35.2)                                  | 1,651 (35.6)       | 0.03      |
| <b>Surgical Admission, (n=4,337)</b>                        | 182 (74)                                  | 1,952 (47.7)                                  | 2,134 (49.2)       | <0.001    |
| <b>Creatinine, mg/dl, median (Q1-Q3)</b>                    |                                           |                                               |                    |           |
| Baseline (n=1,703)                                          | 1.1 (0.8-1.5)                             | 1 (0.7-1.3)                                   | 1 (0.7-1.3)        | 0.02      |
| Admission (n=4,420)                                         | 1 (0.8-1.5)                               | 1.1 (0.8-1.7)                                 | 1.1 (0.8-1.7)      | 0.007     |
| Reference                                                   | 0.9 (0.8-1.1)                             | 0.9 (0.8-1.1)                                 | 0.9 (0.8-1.1)      | 0.05      |
| <b>Reference eGFR</b>                                       |                                           |                                               |                    |           |
| <30                                                         | 7 (2.7)                                   | 137 (3.1)                                     | 144 (3.1)          |           |
| 30-60                                                       | 35 (13.4)                                 | 467 (10.7)                                    | 502 (10.8)         | 0.38      |
| >60                                                         | 220 (84)                                  | 3,771 (86.2)                                  | 3,991 (86.1)       |           |
| <b>APS-III Score, Median (Q1-Q3), (n=4,616)<sup>a</sup></b> | 47 (35.8-58)                              | 52 (40-66)                                    | 51 (40-65)         | <0.001    |
| <b>Severity of Hypotension, Median(Q1-Q3)<sup>a,b</sup></b> | 0 (0-1)                                   | 0 (0-0)                                       | 0 (0-0)            | 0.04      |
| <b>Suspected Sepsis<sup>a</sup></b>                         | 18 (6.9)                                  | 457 (10.4)                                    | 475 (10.2)         | 0.06      |
| <b>Nephrotoxic Drugs</b>                                    |                                           |                                               |                    |           |
| ACEI/ARB                                                    | 51 (19.5)                                 | 452 (10.3)                                    | 503 (10.8)         | <0.001    |
| Vancomycin                                                  | 31 (11.8)                                 | 382 (8.7)                                     | 413 (8.9)          | 0.09      |

|                                             |            |              |              |        |
|---------------------------------------------|------------|--------------|--------------|--------|
| Aminoglycoside                              | 5 (1.9)    | 95 (2.2)     | 100 (2.2)    | 0.78   |
| Other Antibiotics                           | 10 (3.8)   | 214 (4.9)    | 224 (4.8)    | 0.43   |
| Calcineurin Inhibitor                       | 6 (2.3)    | 117 (2.7)    | 123 (2.7)    | 0.71   |
| Non-Steroidal                               | 115 (43.9) | 1,051 (24)   | 1,166 (25.1) | <0.001 |
| Diuretics                                   | 92 (35.1)  | 985 (22.5)   | 1,077 (23.2) | <0.001 |
| Other Nephrotoxins                          | 3 (1.1)    | 120 (2.7)    | 123 (2.7)    | 0.12   |
| <b>RRT During Hospitalization</b>           | 33 (12.6)  | 275 (6.3)    | 308 (6.6)    | <0.001 |
| <b>Length of Stay, Days, Median (Q1,Q3)</b> |            |              |              |        |
| Hospital                                    | 16 (11-27) | 11 (7-21)    | 12 (7-21)    | <0.001 |
| ICU                                         | 7 (4-11)   | 4 (3-7)      | 4 (3-7)      | <0.001 |
| <b>Hospital Mortality</b>                   | 71 (27.1)  | 638 (14.6)   | 709 (15.3)   | <0.001 |
| <b>30-day Mortality<sup>c</sup></b>         | 67 (25.6)  | 672 (15.4)   | 739 (15.9)   | <0.001 |
| <b>90-day Mortality<sup>c</sup></b>         | 89 (34)    | 1,001 (22.9) | 1,090 (23.5) | <0.001 |
| <b>365-day Mortality<sup>c</sup></b>        | 112 (42.7) | 1,460 (33.4) | 1,572 (33.9) | 0.002  |

MV = Mechanical ventilation. \*Includes patients that never received MV or Vasopressors \*\*P-value for the comparison of Columns 1 and 2. <sup>a</sup> Measured within 24 hours following ICU admission. <sup>b</sup> Area under the curve for severity and duration of hypotension (see methods). APS-III Score = acute physiology score (see methods).

**Supplemental Figure 1:** Age-Adjusted 1-year Survival by Maximum KDIGO Stage Determined on ICU Day 7 within Each Group. **Top panel:** age was available in n = 18,011 patients. **Bottom panel:** age was available in n = 22,125 patients

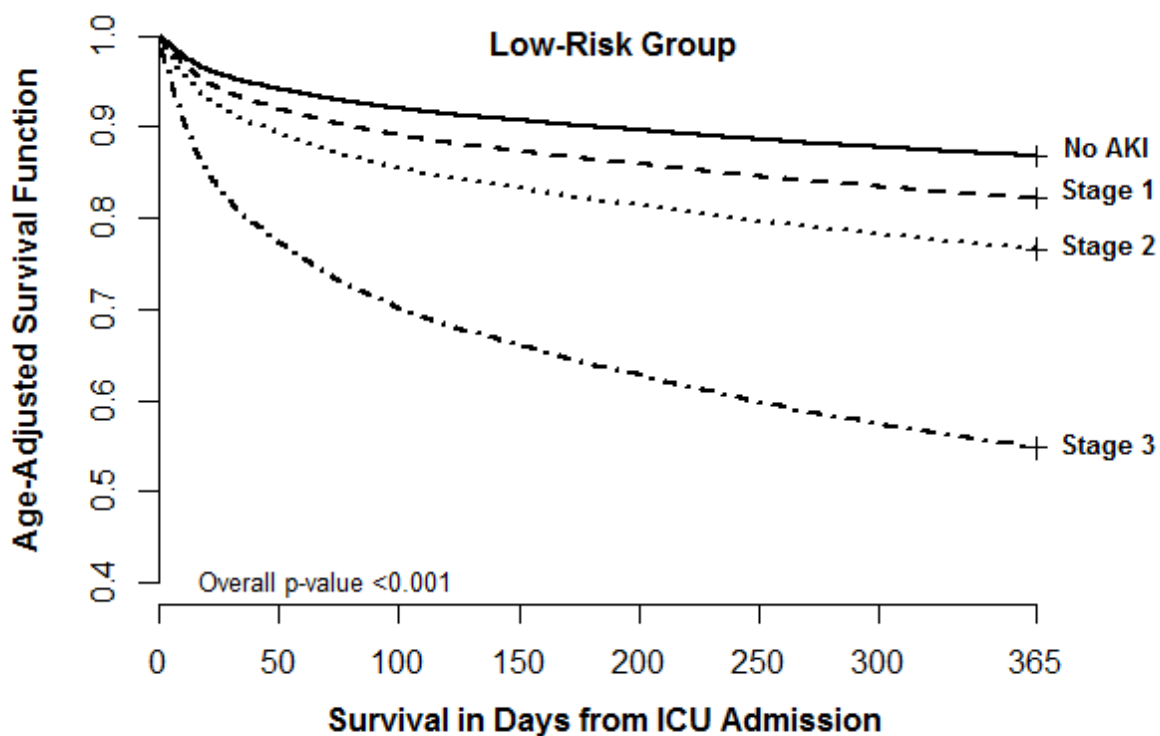

**No. at risk**

|                |      |      |      |      |      |      |      |      |
|----------------|------|------|------|------|------|------|------|------|
| <b>No AKI</b>  | 9892 | 9386 | 9148 | 9018 | 8889 | 8765 | 8663 | 8534 |
| <b>Stage 1</b> | 3482 | 3140 | 3011 | 2931 | 2881 | 2815 | 2771 | 2727 |
| <b>Stage 2</b> | 3557 | 3035 | 2856 | 2763 | 2680 | 2608 | 2554 | 2501 |
| <b>Stage 3</b> | 1080 | 713  | 660  | 627  | 605  | 593  | 579  | 564  |

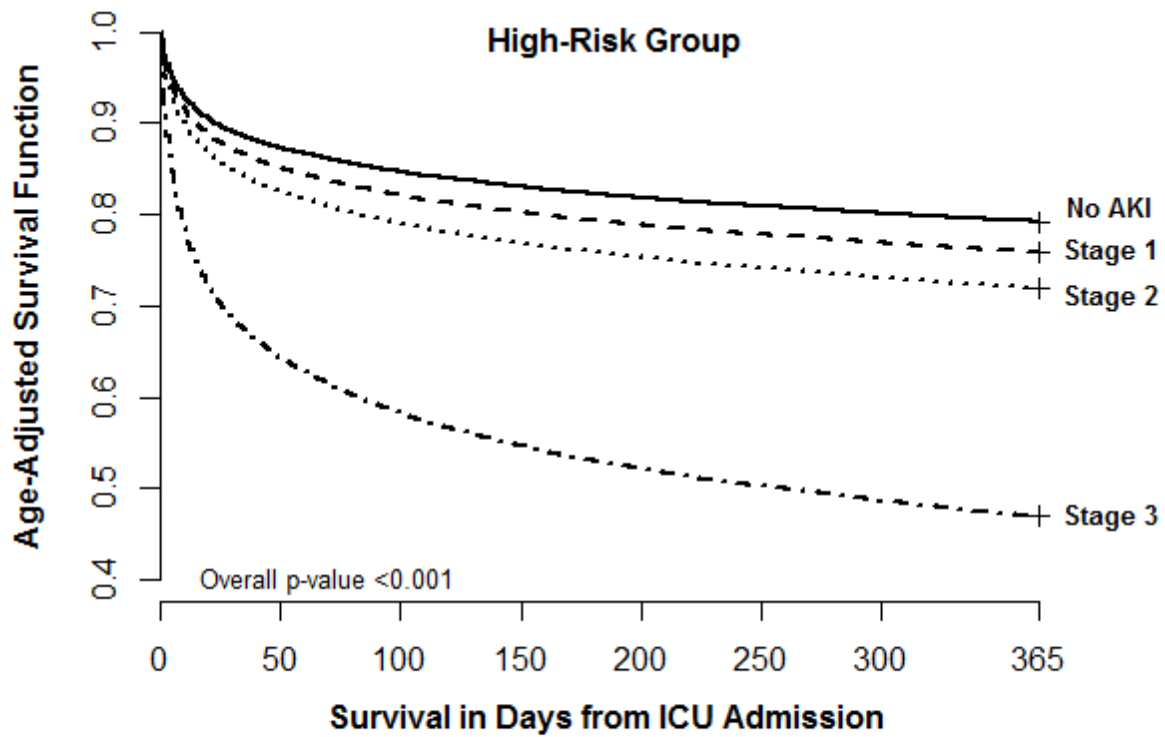

**No. at risk**

|                |      |      |      |      |      |      |      |      |
|----------------|------|------|------|------|------|------|------|------|
| <b>No AKI</b>  | 6391 | 5599 | 5466 | 5367 | 5304 | 5244 | 5195 | 5127 |
| <b>Stage 1</b> | 4283 | 3614 | 3479 | 3400 | 3324 | 3271 | 3222 | 3173 |
| <b>Stage 2</b> | 8086 | 6512 | 6174 | 5965 | 5808 | 5706 | 5606 | 5509 |
| <b>Stage 3</b> | 3365 | 1940 | 1748 | 1654 | 1595 | 1546 | 1513 | 1479 |
